# Supplementary material
Source: PubMed Central journal article supplement (PMC2760112)
Supplement: emboj2009235s1.pdf [file emboj2009235s1.pdf]

| peptides # | proteins unique to RECQ4 IP | common contaminants | MW (kDa) |
|------------|-----------------------------|---------------------|----------|
| 25         | MCM10                       |                     | 98       |
| 23         | RECQ4                       |                     | 136      |
| 21         | MCM2                        |                     | 102      |
| 20         |                             | HNRPM               | 77       |
| 19         | MCM7                        |                     | 81       |
| 17         | MCM6                        |                     | 93       |
| 16         | MCM3                        |                     | 91       |
| 15         | MCM4                        |                     | 97       |
| 12         | MCM5                        |                     | 82       |
| 11         |                             | MATR3               | 95       |
| 10         |                             | HNRNPH1             | 49       |
| 10         |                             | DDX17               | 72       |
| 8          |                             | HNRPK               | 51       |
| 8          |                             | ACTIN               | 32       |
| 8          |                             | KIF11               | 119      |
| 7          |                             | SF3B3               | 136      |
| 7          | TIM                         |                     | 138      |
| 7          |                             | BCLF1               | 106      |
| 6          |                             | STK38               | 54       |
| 6          |                             | U520                | 200      |
| 5          |                             | RBM10               | 103      |
| 4          | CDC45                       |                     | 66       |
| 4          |                             | DHX15               | 91       |
| 4          |                             | HS70L               | 70       |
| 4          |                             | SF3B1               | 146      |
| 3          | SLD5                        |                     | 26       |
| 3          | PSF3                        |                     | 25       |
| 3          |                             | MEP50               | 37       |
| 2          |                             | TBA2                | 50       |
| 2          |                             | HNRPR               | 71       |
| 2          |                             | HNRPU               | 90       |
| 2          |                             | RIF1                | 274      |
| 2          |                             | TBA6                | 50       |
| 2          |                             | RBM14               | 69       |
| 2          |                             | SPIN1               | 30       |
| 1          | TIPIN                       |                     | 35       |
| 1          | PSF1                        |                     | 23       |
| 1          | PSF2                        |                     | 21       |

Xu et al, Supp Figure 1
