# Supplementary material
Source: PubMed Central journal article supplement (PMC2760112)
Supplement: emboj2009235s4.pdf [file emboj2009235s4.pdf]

Manuscript EMBO-2009-71527

## **MCM10 mediates RECQ4 association with MCM2-7 helicase complex during DNA replication**

Xiaohua Xu, Patrick Rochette, Eminent Feyissa, Tina Su

*Corresponding author: Yilun Liu, Yale University School of Medicine*

---

### **Review timeline:**

Submission date:

16 March 2009

Accepted:

20 July 2009

---

No Review Process File is available with this article, as the authors have chosen not to make the review process public in this case.
