# Supplementary material
Source: PubMed Central journal article supplement (PMC2760112)

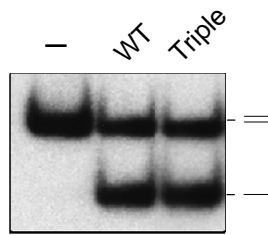

Xu et al, Supp Figure 2

Supplement: emboj2009235s2.pdf [file emboj2009235s2.pdf]
